# Supplementary material for: Snakes Elaphe Radiata May Acquire Awareness of Their Body Limits When Trying to Hide in a Shelter
Source: Behav Sci (Basel). 2019 Jun 26;9(7):67. doi: 10.3390/bs9070067 (PMC6681033; doi:10.3390/bs9070067)
Supplement: Supplementary file 1 [file behavsci-09-00067-s001.xlsx]

## Sheet: Group 1
	The tables show the number of unsuccessful penetration in each series before the snake reached the сriterion of learning.
	Table 1S. Series 1: Nubder of unsuccessful penetrations
	Trials	Snake 1	Snake 2	Snake 3	Snake 4	Snake 5	Snake 6	Snake 7	Snake 8	Snake 9	Snake 10	sum
	1	4	2	1	0	2	4	1	3	2	2	21
	2	5	2	2	3	1	4	1	2	1	2	23
	3	3	2	4	4	3	3	2	2	3	0	26
	4	4	2	4	2	2	0	3	0	0	2	19
	5	1	0	3	0	1	1	2	4	4	1	17
	6	2	0	0	4	0	0	1	1	2	0	10
	7	1	0	1	0	4	1	1	2	1	0	11
	8	0	1	0	2	4	0	3	2	0	2	14
	9	1	0	2	0	2	0	2	1	1	0	9
	10	2	2	0	1	0	0	0	1	0	0	6
	11	0	2	1	3	0	2	0	1	2	1	12
	12	0	0	1	0	0	1	1	0	0	0	3
	13	1	0	0	0	2	0	1	0	0	2	6
	14	0	1	0	1	0	1	0	2	0	3	8
	15	2	0	0	0	0	0	0	0	2	0	4
	16	0	0	0	0	0	1	0	0	0	0	1
	17	0	0	0	0	0	0	0	0	0	0	0
	18	0	0		2	0	0	0	0	1	0	3
	19	0	0		0		0		0	1	0	1
	20	0			0		0			0		0
	21				0		0			0		0
	22				0					0		0
	23				0					0		0
	24									0		0
	Table 2S. Series 2: Nubder of unsuccessful penetrations
	Trials	Snake 1	Snake 2	Snake 3	Snake 4	Snake 5	Snake 6	Snake 7	Snake 8	Snake 9	Snake 10	sum
	1	1	2	2	1	1	2	1	1	1	1	13
	2	2	1	2	1	2	1	2	0	1	1	13
	3	0	1	1	2	1	2	1	1	0	0	9
	4	1	1	1	2	2	2	1	1	1	0	12
	5	2	1	1	0	2	0	2	1	1	1	11
	6	3	2	0	0	0	0	0	0	0	2	7
	7	1	1	1	1	1	1	0	1	0	2	9
	8	2	1	1	1	0	0	0	1	1	0	7
	9	0	1	0	1	1	0	2	1	0	1	7
	10	1	1	0	0	0	1	3	0	2	0	8
	11	1	1	0	1	1	2	0	0	0	0	6
	12	2	2	0	0	1	0	1	0	1	2	9
	13	0	1	0	0	0	1	0	0	0	0	2
	14	0	0		0	0	0	2	0	0	1	3
	15	0	1		0	0	0	0		0	0	1
	16	0	0		0	0	0	0		0	0	0
	17	0	0			0	0	0		0	0	0
	18		0				0	0			0	0
	19		0					0			0	0
	20		0									0
	Table 3S. Series 3: Nubder of unsuccessful penetrations
	Trials	Snake 1	Snake 2	Snake 3	Snake 4	Snake 5	Snake 6	Snake 7	Snake 8	Snake 9	Snake 10	sum
	1	1	0	0	1	1	0	0	1	0	0	4
	2	0	1	0	1	0	0	1	0	0	0	3
	3	0	0	0	0	0	1	0	0	2	1	4
	4	0	0	1	0	0	1	0	0	0	0	2
	5	1	0	0	0	0	0	0	1	0	0	2
	6	0	0	0	0	1	0	1	0	0	0	2
	7	0	1	0	0	0	0	0	0	1	0	2
	8	0	0	0		0	0	0	1	0	0	1
	9	0	0	0		0	0	0	0	0		0
	10	0	0			0		0	0	0		0
	11		0			0		0	0	0		0
	12		0						0	0		0
	13								0			0
	Table 4S. Series 4: Nubder of unsuccessful penetrations
	Trials	Snake 1	Snake 2	Snake 3	Snake 4	Snake 5	Snake 6	Snake 7	Snake 8	Snake 9	Snake 10	sum
	1	0	1	0	0	0	1	0	0	0	0	2
	2	0	0	0	0	0	0	0	0	1	0	1
	3	1	0	0	0	0	0	0	0	0	0	1
	4	0	0	1	0	1	0	0	0	0	0	2
	5	0	0	1	0	0	0	0	0	0	0	1
	6	0	0	0	0	0	0	0	0	1	0	1
	7	1	0	0	0	0	0	0	0	0	1	2
	8	0	0	0	0	0	0	0	0	0	1	1
	9	0	1	0	0	0	0	0	0	1	0	2
	10	0	0	0	0	0	0	0	0	0	0	0
	11	0	0	0	0	0	0	0	1	0	0	1
	12	0	0	0	0	0	0	0	0	0	1	1
	13	0	0	0	0	1	0	0	0	0	0	1
	14	1	0	0	0	0	0	0	0	1	0	2
	15	0	0	0	0	0	0	0	0	0	0	0
	16	0	0	0	0	0	0	0	0	0	0	0
	17	0	1	0	0	0	0	0	0	0	0	1
	18	0	0	0	0	0	1	0	0	0	0	1
	19	0	1	0	0	0	0	0	0	0	0	1
	20	0	0	0	0	1	0	0	0	0	0	1
	Sum	3	4	2	0	3	2	0	1	4	3	22

## Sheet: Group 2
	The tables show the number of unsuccessful penetration in each series before the snake reached the сriterion of learning.
	Table 5S. Series 1: Nubder of unsuccessful penetrations
	Trials	Snake 1	Snake 2	Snake 3	Snake 4	Snake 5	Snake 6	Snake 7	Snake 8	Snake 9	Snake 10	sum
	1	0	3	3	3	0	4	2	2	3	4	24
	2	4	2	0	2	2	3	2	2	2	2	21
	3	2	3	2	2	3	1	2	4	1	1	21
	4	3	0	2	2	3	3	1	0	2	3	19
	5	4	2	1	0	2	0	3	0	1	2	15
	6	1	4	0	1	2	2	1	1	1	4	17
	7	0	1	0	1	0	1	2	2	1	3	11
	8	1	0	3	0	0	2	1	0	3	0	10
	9	0	1	2	1	1	0	0	0	0	2	7
	10	1	0	2	1	1	1	0	1	0	1	8
	11	0	1	0	2	0	2	0	1	0	1	7
	12	1	0	0	0	1	1	1	0	1	1	6
	13	1	0	1	0	1	0	1	0	0	0	4
	14	0	0	1	0	0	0	0	1	2	0	4
	15	0	0	0	0	1	2	0	0	0	0	3
	16	0	0	0	0	0	1	0	0	1	0	2
	17	0		0		0	0	0	0	1	1	2
	18	0		1		0	0	0	0	0	0	1
	19			0		0	0		0	0	0	0
	20			0		0	0			0	0	0
	21			0			0			0	0	0
	22			0						0	0	0
	23			0								0
	Table 6S. Series 2: Nubder of unsuccessful penetrations
	Trials	Snake 1	Snake 2	Snake 3	Snake 4	Snake 5	Snake 6	Snake 7	Snake 8	Snake 9	Snake 10	sum
	1	7	5	4	5	2	6	5	4	3	3	44
	2	6	7	4	2	2	3	2	5	2	3	36
	3	4	3	4	4	3	4	2	3	3	4	34
	4	2	2	3	3	4	2	2	2	4	2	26
	5	3	4	1	1	1	2	0	1	2	3	18
	6	3	4	0	1	0	0	4	1	1	1	15
	7	2	2	0	1	2	1	0	1	1	3	13
	8	0	4	2	0	2	0	2	1	0	3	14
	9	3	0	1	3	0	2	2	0	1	1	13
	10	2	0	1	2	0	1	0	0	0	0	6
	11	0	0	0	0	1	0	1	1	1	2	6
	12	1	0	0	0	1	1	0	0	0	3	6
	13	1	0	2	2	0	0	0	1	1	1	8
	14	0		0	1	0	1	0	0	1	0	3
	15	0		0	0	1	1	1	0	0	1	4
	16	0		0	0	0	1	0	0	0	1	2
	17	0		0	0	0	0	0	0	0	0	0
	18	0		0	0	0	0	0	0	0	0	0
	19				0	0	0	0		0	0	0
	20					0	0	0			0	0
	21						0				0	0
	Table 7S.Series 3: Nubder of unsuccessful penetrations
	Trials	Snake 1	Snake 2	Snake 3	Snake 4	Snake 5	Snake 6	Snake 7	Snake 8	Snake 9	Snake 10	sum
	1	1	1	0	2	1	0	1	0	0	1	7
	2	0	2	1	0	0	2	0	1	0	1	7
	3	1	0	1	1	0	0	2	0	2	0	7
	4	1	0	0	2	0	0	1	0	1	0	5
	5	0	0	0	0	2	1	0	2	0	0	5
	6	0	1	1	0	0	1	0	0	0	1	4
	7	1	0	1	1	1	0	0	0	0	0	4
	8	0	0	0	0	1	0	1	1	1	0	4
	9	0	0	1	1	1	0	0	0	0	0	3
	10	0	0	0	1	0	1	0	0	0	1	3
	11	0		0	0	0	1	0	0	0	1	2
	12			0	1	0	0	0	0	0	0	1
	13			0	0	0	0	0	0	0	0	0
	14			0	0	0	0				0	0
	15				0		0				0	0
	16				0		0				0	0
	17				0							0
	Table 8S. Series 4: Nubder of unsuccessful penetrations
	Trials	Snake 1	Snake 2	Snake 3	Snake 4	Snake 5	Snake 6	Snake 7	Snake 8	Snake 9	Snake 10	sum
	1	0	1	0	1	1	0	0	0	0	0	3
	2	0	1	0	0	0	0	0	1	0	0	2
	3	1	0	0	1	0	0	0	0	0	1	3
	4	1	0	0	0	0	0	0	0	0	0	1
	5	0	0	0	0	1	0	0	0	0	0	1
	6	0	0	1	0	0	1	0	0	0	1	3
	7	1	0	0	0	0	0	0	0	0	0	1
	8	0	1	0	0	0	0	1	0	0	0	2
	9	0	0	0	0	0	0	0	0	0	0	0
	10	0	0	0	0	0	0	1	0	0	1	2
	11	1	1	0	0	0	1	0	0	0	0	3
	12	0	0	1	0	0	0	0	1	0	0	2
	13	0	0	0	1	0	0	0	0	0	0	1
	14	0	0	0	0	0	1	0	0	1	0	2
	15	0	0	0	0	0	0	0	0	1	0	1
	16	0	0	1	0	0	0	0	0	1	0	2
	17	0	0	0	0	1	0	0	0	0	0	1
	18	0	1	0	0	0	0	0	1	0	0	2
	19	0	0	0	1	0	0	0	0	0	0	1
	20	0	0	0	0	0	0	0	1	0	0	1
	Sum	4	5	3	4	3	3	2	4	3	3	34
